# Supplementary material for: Only a minority of bacteria grow after wetting in both natural and post-mining biocrusts in a hyperarid phosphate mine
Source: Copernicus journal article supplement (doi:10.5194/soil-9-231-2023), 2023-05-02
Supplement: Supplementary file 1 [file soil-9-231-2023-supplement.pdf]

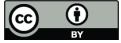

*Supplement of*

## **Only a minority of bacteria grow after wetting in both natural and post-mining biocrusts in a hyperarid phosphate mine**

**Talia Gabay et al.**

*Correspondence to:* Roey Angel ([roey.angel@bc.cas.cz](mailto:roey.angel@bc.cas.cz)) and Talia Gabay ([taliajoann@gmail.com](mailto:taliajoann@gmail.com))

The copyright of individual parts of the supplement might differ from the article licence.

## Supplementary figures

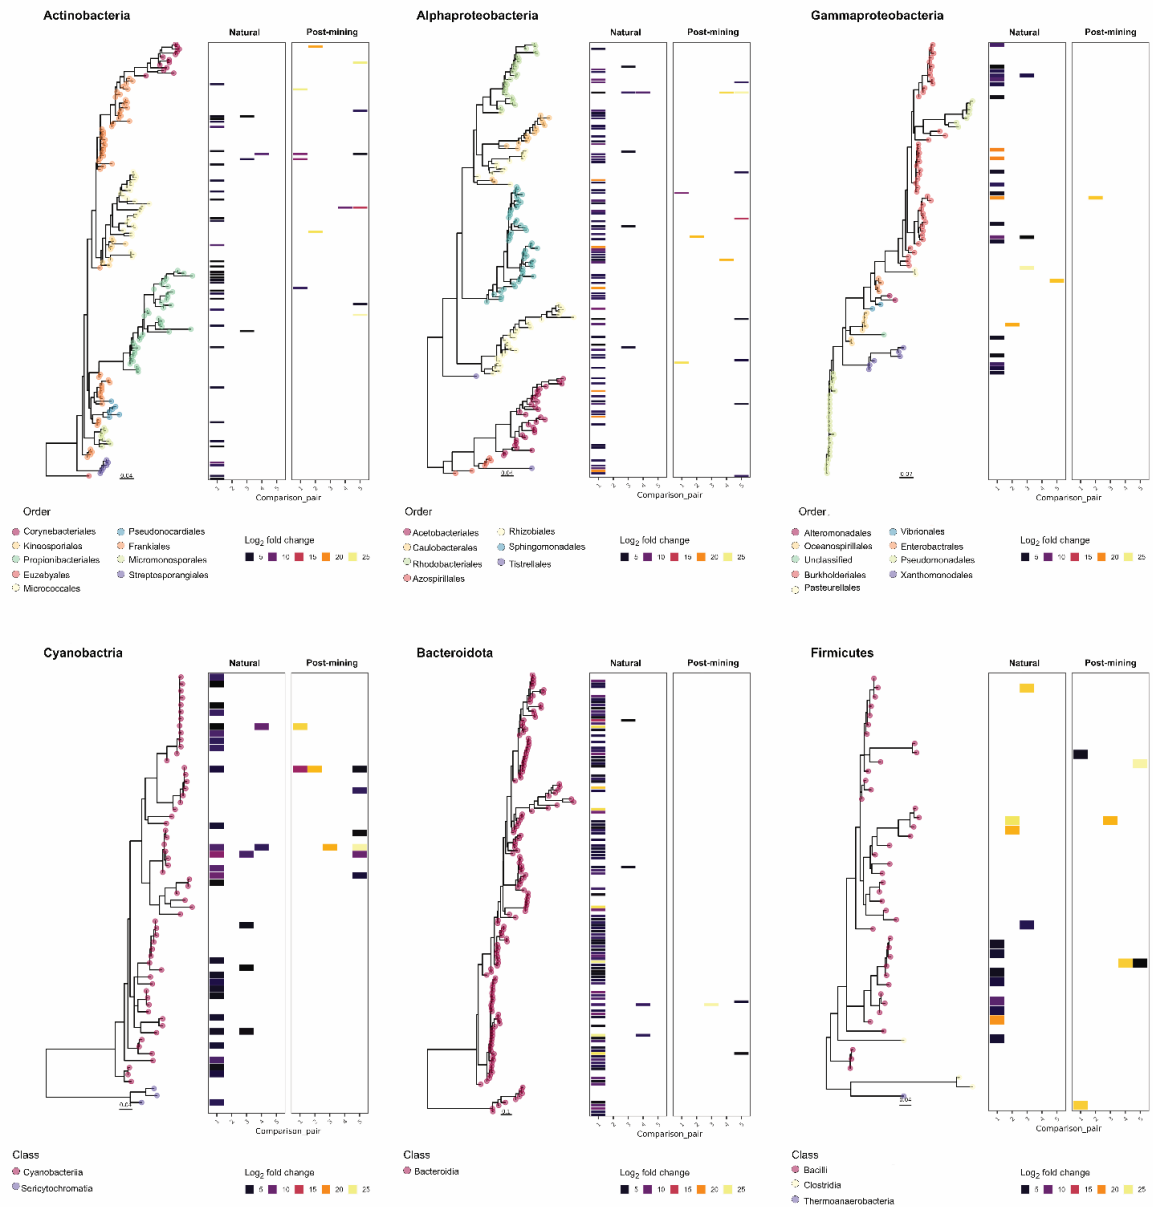

**Figure S1.** Heatmaps and phylogenetic trees of active bacterial ASVs. Each figure represents a different phylum or class, the different colors in the tips of the phylogenetic trees represent different orders/classes. The squares in the heatmaps represent active ASVs assigned to a specific taxa and the color of each square is the number of Log<sub>2</sub> fold change. Every column represents a natural or post-mining sample.

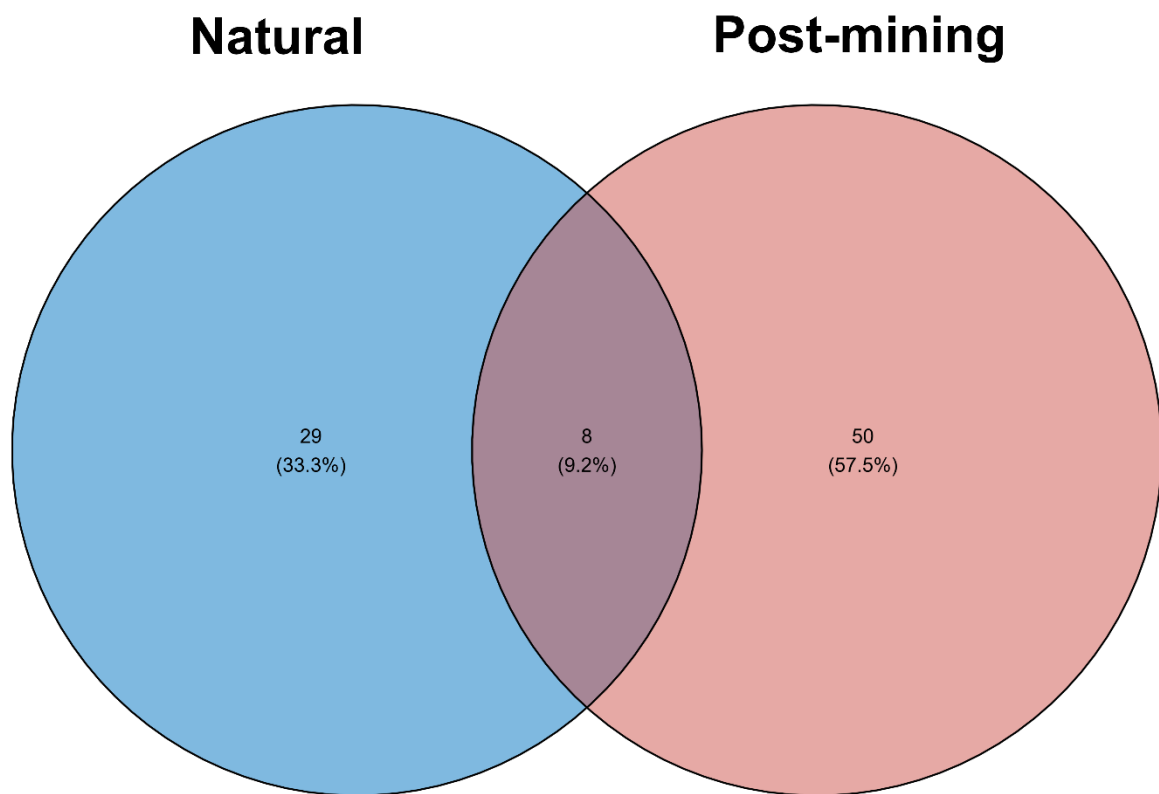

**Figure S2.** Venn diagram representing unique sequences in natural (blue) and post-mining (pink) samples. Overlap represents sequences that appear in both groups.

## Supplementary tables

**Table S1.** Chlorophyll *a* concentration of all collected biocrust samples. Highlighted samples are the ones chosen for the SIP assay. The positive control consisted of 0.01 gr spirulina mixed with 30 gr of soil.

| Plot type          | Sample Number    | Chla/gr soil |
|--------------------|------------------|--------------|
| Positive control   | Positive control | 9.98         |
| <b>Natural</b>     | <b>2</b>         | <b>9.11</b>  |
| <b>Natural</b>     | <b>7</b>         | <b>6.81</b>  |
| <b>Natural</b>     | <b>3</b>         | <b>6.73</b>  |
| <b>Natural</b>     | <b>1</b>         | <b>6.26</b>  |
| <b>Natural</b>     | <b>4</b>         | <b>5.30</b>  |
| Natural            | 6                | 5.10         |
| Natural            | 9                | 4.92         |
| Natural            | 8                | 4.91         |
| Natural            | 5                | 4.90         |
| Natural            | 10               | 4.77         |
| <b>Post-mining</b> | <b>7</b>         | <b>9.05</b>  |
| <b>Post-mining</b> | <b>8</b>         | <b>8.02</b>  |
| <b>Post-mining</b> | <b>3</b>         | <b>7.79</b>  |
| <b>Post-mining</b> | <b>4</b>         | <b>7.37</b>  |
| <b>Post-mining</b> | <b>5</b>         | <b>6.28</b>  |
| Post-mining        | 10               | 6.09         |
| Post-mining        | 9                | 5.41         |
| Post-mining        | 6                | 5.07         |
| Post-mining        | 2                | 4.92         |
| Post-mining        | 1                | 4.91         |
| Negative control   | Negative control | 4.42         |

**Table S2.** Read information for samples.

|        |         |
|--------|---------|
| Min.   | 602     |
| Max.   | 29,1129 |
| Median | 23,739  |
| Mean   | 47,311  |

**Table S3.** Numbers of ASVs throughout the pipeline.

|                                                           |        |
|-----------------------------------------------------------|--------|
| Non-chimera ASVs                                          | 10,275 |
| Number of ASVs after decontamination                      | 10,100 |
| Number of ASVs after prevalence filtering                 | 1,404  |
| Labelled ASVs (used for differential abundance modelling) | 1,266  |

**Table S4.** Mean relative abundance of phyla and p-values of Mann-Whitney test comparing natural and post-mining abundances.

| Phylum           | Natural | Post-mining | p-value |
|------------------|---------|-------------|---------|
| Actinobacteriota | 10.60   | 25.92       | 0.26    |
| Bacteroidota     | 1.79    | 3.06        | 0.89    |
| Cyanobacteria    | 7.16    | 16.76       | 0.26    |
| Firmicutes       | 21.05   | 7.13        | 1       |
| Gemmatimonadota  | 13.35   | 3.45        | 1       |
| Myxococcota      | 0.01    | 2.03        | 0.56    |
| Patescibacteria  | 0.65    | 16.18       | 0.22    |
| Proteobacteria   | 40.81   | 24.99       | 0.9     |
| Unclassified     | 4.58    | 0.48        | 0.86    |

**Table S5.** Means and Standard Deviation of functional gene abundances of the 11 function categories.

| <b>Function category</b>             | <b>Natural abundance</b> | <b>Post-mining abundance</b> |
|--------------------------------------|--------------------------|------------------------------|
| Autotrophy                           | 1,233.16 ± 163.63        | 2,245 ± 1,890.48             |
| DNA conservation                     | 27,724.12 ± 14,087.9     | 75,650.46 ± 68,237.54        |
| DNA repair and degradation           | 47,773.57 ± 27,991.98    | 92,325.27 ± 87,069.01        |
| Inorganic and gaseous energy sources | 4,919.22 ± 2,600.75      | 37,345.44 ± 33,585.23        |
| Nitrogen                             | 18,868.56 ± 12,281.28    | 53,779.92 ± 52,389.59        |
| Organic energy source                | 26,0292.75 ± 87,385.81   | 57,4701.52 ± 58,3317.8       |
| Phototrophy                          | 12,436.05 ± 9,531.33     | 114,470.9 ± 96,555.88        |
| ROS-damage prevention                | 47,572.92 ± 2,4443.2     | 116,383.04 ± 96,627.67       |
| Sensing and motility                 | 128,620.08 ± 86,886.19   | 189,995.54 ± 190,637.5       |
| Sporulation capsule and C-storage    | 45,891.06 ± 34,684.91    | 101,349.6 ± 105,002.3        |
